# Supplementary material
Source: PubMed Central journal article supplement (PMC7755098)
Supplement: NIHMS1590042-supplement-supplemental_material.pdf [file NIHMS1590042-supplement-supplemental_material.pdf]

## SUPPLEMENTAL MATERIAL TO NMEZI et al.

### Development and optimization of a high content analysis platform to identify suppressors of lamin B1 overexpression as a therapeutic strategy for Autosomal Dominant Leukodystrophy

Bruce Nmezi<sup>1\*</sup>, Laura L. Vollmer<sup>2,\*</sup>, Tong Ying

Shun<sup>2</sup>, Albert Gough<sup>2,3</sup>, Harshvardhan Rolyan<sup>1,4</sup>, Fang Liu<sup>1</sup>, Yumeng Jia<sup>1</sup>, Quasar S. Padiath<sup>1,†</sup>, and

Andreas Vogt<sup>2,3 †</sup>

<sup>1</sup> Department of human genetics, Graduate School of Public Health, University of Pittsburgh, Pittsburgh PA 15261

<sup>2</sup> Drug Discovery Institute, University of Pittsburgh Medical School, Pittsburgh PA 15260

<sup>3</sup> Department of Computational and Systems Biology, University of Pittsburgh Medical School, Pittsburgh PA 15260

<sup>4</sup> Current address: Department of Internal Medicine, Yale University, New Haven, CT

#### Contents

**Supplemental Table 1.** HCA parameters used to quantify lamin B1-mediate nuclear abnormalities.

**Supplemental Figure 1.** Lamin B1 expression and nuclear texture in fibroblasts from ADLD patients and healthy donors.

**Supplemental Figure 2.** Lamin B1 expression kinetics after doxycycline withdrawal.

**Supplemental Figure 3.** Three-day variability.

**Supplemental Table 1. HCA parameters used to quantify lamin B1-mediated nuclear abnormalities.**

| Parameter                            | Description                                                                                                                                               | Proxy for                                                          | S/B  | Z-Factor | LDA Loading |
|--------------------------------------|-----------------------------------------------------------------------------------------------------------------------------------------------------------|--------------------------------------------------------------------|------|----------|-------------|
| <b>Within cell measurements</b>      |                                                                                                                                                           |                                                                    |      |          |             |
| <b>Intensities</b>                   |                                                                                                                                                           |                                                                    |      |          |             |
| MEAN_ObjectAvgIntenCh1               | well mean of Hoechst average pixel intensity per object defined by Hoechst staining                                                                       | DNA staining intensity                                             | 1.67 | 0.30     | -36.20      |
| MEAN_ObjectTotalIntenCh1             | well mean of Hoechst integrated pixel intensity per object defined by Hoechst staining                                                                    | DNA content                                                        | 1.33 | -0.25    | 20.21       |
| MEAN_AvgIntenCh2                     | well mean of Cy3 average pixel intensity per object defined by Hoechst staining                                                                           | mean lamin B1 expression                                           | 3.93 | 0.51     | -45.31      |
| MEAN_TotalIntenCh2                   | well mean of Cy3 integrated pixel intensity per object defined by Hoechst staining                                                                        | total lamin B1 expression                                          | 4.89 | 0.50     | 42.56       |
| MEAN_AvgIntenCh3                     | well mean of Cy5 average pixel intensity per object defined by Hoechst staining                                                                           | mean lamin AC expression                                           | 1.36 | -1.90    | -18.46      |
| MEAN_TotalIntenCh3                   | well mean of Cy5 integrated pixel intensity per object defined by Hoechst staining                                                                        | total lamin AC expression                                          | 1.06 | -14.85   | 19.25       |
| <b>Intensity distributions</b>       |                                                                                                                                                           |                                                                    |      |          |             |
| MEAN_ObjectVarIntenCh1               | well mean of Hoechst variance of pixel intensities per object defined by Hoechst staining                                                                 | DNA texture                                                        | 1.55 | 0.11     | 6.21        |
| MEAN_VarIntenCh2                     | well mean of Cy3 variance of pixel intensities per object defined by Hoechst staining                                                                     | Lamin B1 texture                                                   | 2.95 | 0.49     | -10.16      |
| MEAN_VarIntenCh3                     | well mean of Cy5 variance of pixel intensities per object defined by Hoechst staining                                                                     | Lamin AC texture                                                   | 1.26 | -2.96    | 1.91        |
| <b>Shape</b>                         |                                                                                                                                                           |                                                                    |      |          |             |
| MEAN_ObjectAreaCh1                   | well mean of number of pixels per object defined by Hoechst staining                                                                                      | nucleus size                                                       | 1.26 | 0.16     | -38.15      |
| MEAN_ObjectShapeLWRCh1               | well mean of length-to-width ratio per object defined by Hoechst staining                                                                                 | nucleus elongation                                                 | 1.04 | 0.17     | 1.45        |
| MEAN_ObjectShapeP2ACh1               | well mean of perimeter-to-area ratio per object defined by Hoechst staining                                                                               | nucleus shape irregularity (REF 1)                                 | 1.05 | 0.64     | -4.97       |
| <b>Cell-to-cell measurements</b>     |                                                                                                                                                           |                                                                    |      |          |             |
| <b>Intensities</b>                   |                                                                                                                                                           |                                                                    |      |          |             |
| SD_ObjectAvgIntenCh1                 | well standard deviation of Hoechst average pixel intensity per object defined by Hoechst staining                                                         | well heterogeneity of DNA staining                                 | 1.53 | -1.89    | -5.23       |
| SD_ObjectTotalIntenCh1               | well standard deviation of Hoechst integrated pixel intensity per object defined by Hoechst staining                                                      | well heterogeneity of DNA content                                  | 1.12 | -15.31   | 1.13        |
| SD_AvgIntenCh2                       | well standard deviation of Cy3 average pixel intensity per object defined by Hoechst staining                                                             | well heterogeneity of mean cellular lamin B1 expression levels     | 3.31 | 0.32     | -2.20       |
| SD_TotalIntenCh2                     | well standard deviation of Cy3 integrated pixel intensity per object defined by Hoechst staining                                                          | well heterogeneity of total cellular lamin B1 expression levels    | 4.64 | 0.13     | 2.30        |
| SD_AvgIntenCh3                       | well standard deviation of Cy5 average pixel intensity per object defined by Hoechst staining                                                             | well heterogeneity of mean cellular lamin AC expression levels     | 1.26 | -2.65    | -1.67       |
| SD_TotalIntenCh3                     | well standard deviation of Cy5 integrated pixel intensity per object defined by Hoechst staining                                                          | well heterogeneity of total cellular lamin AC expression levels    | 1.19 | -3.97    | -2.54       |
| <b>Intensity distributions</b>       |                                                                                                                                                           |                                                                    |      |          |             |
| SD_ObjectVarIntenCh1                 | well standard deviation of Hoechst variance of pixel intensities per object defined by Hoechst staining                                                   | distribution of DNA textures                                       | 1.49 | -1.47    | 2.76        |
| SD_VarIntenCh2                       | well standard deviation of Cy3 variance of pixel intensities per object defined by Hoechst staining                                                       | distribution of lamin B1 textures                                  | 4.33 | -0.34    | -1.34       |
| SD_VarIntenCh3                       | well standard deviation of Cy5 variance of pixel intensities per object defined by Hoechst staining                                                       | distribution of lamin AC textures                                  | 1.23 | -3.74    | 0.34        |
| <b>Shape</b>                         |                                                                                                                                                           |                                                                    |      |          |             |
| SD_ObjectAreaCh1                     | well standard deviation of number of pixels per object defined by Hoechst staining                                                                        | distribution of nucleus sizes within wells                         | 1.48 | 0.22     | 0.42        |
| SD_ObjectShapeLWRCh1                 | well standard deviation of length-to-width ratio per object defined by Hoechst staining                                                                   | distribution of elongated nuclei within a well                     | 1.32 | 0.10     | 1.04        |
| SD_ObjectShapeP2ACh1                 | well standard deviation of perimeter-to-area ratio per object defined by Hoechst staining                                                                 | distribution of misshapen nuclei within a well                     | 1.55 | 0.06     | -0.38       |
| <b>Heterogeneity Indices (REF 2)</b> |                                                                                                                                                           |                                                                    |      |          |             |
| KS_Norm_AvgIntenCh2                  | Kolmogorov-Smirnov comparison of the population distribution of AvgIntenCh2 per object with a Normal distribution of the same mean and standard deviation | describes the deviation of a population from a normal distribution | 1.67 | -1205.00 | -0.96       |
| QE_AvgIntenCh2                       | Quadratic entropy of the population distribution of AvgIntenCh2 per object                                                                                | describes differences in with and shape of populations             | 4.00 | 0.75     | 4.55        |
| Percent_Outlier_AvgIntenCh2          | number of objects with an AvgIntenCh2 that is above the upper inner fence or below the lower inner fence of the box plot                                  | extent of abnormally high or low responses                         | 1.43 | -2.55    | -0.05       |

1. Sorokin DV et al., Localized movement and morphology of UBF1-positive nucleolar regions are changed by gamma-irradiation in G2 phase of the cell cycle. *Nucleus*. 2015;6(4):301-13.

2. Gough AH et al., Identifying and quantifying heterogeneity in high content analysis: application of heterogeneity indices to drug discovery. *PLoS One*. 2014;9(7):

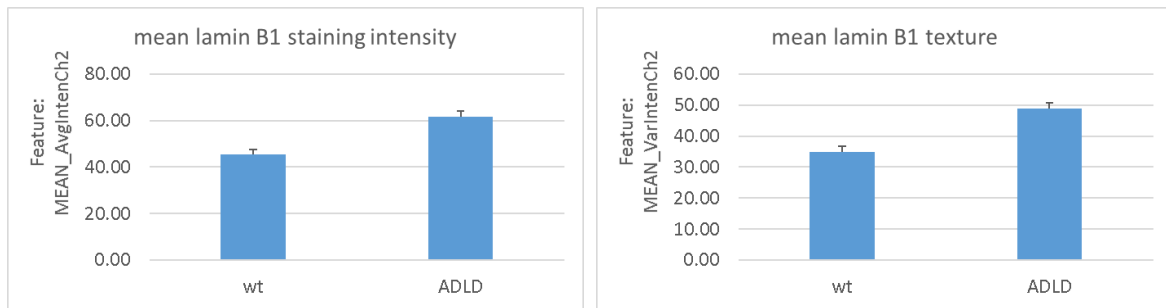

**Supplemental Figure 1. Lamin B1 expression and nuclear texture in fibroblasts from ADLD patients and healthy donors.** Cells were plated in 96 well plates and immunostained with an anti-lamin B1-FITC primary/secondary antibody pair. Differences in lamin B1 expression and texture were analyzed by image-based analysis on an ArrayScan II high content reader. ADLD patient fibroblasts show higher expression of lamin B1 expression and higher nuclear texture but the differences are small when assessed on a well average level. (n=4, p<0.001 by Student's t-test, two sided, unequal variances). Data are from a single donor source of ADLD patient cells and represent mean  $\pm$  SD of four technical replicates.

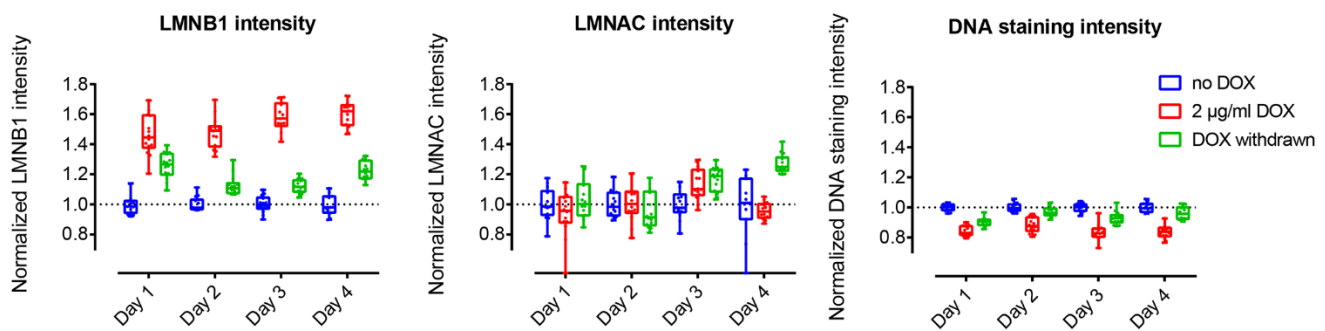

**Supplemental Figure 2. Lamin B1 expression kinetics after doxycycline withdrawal.** Freshly isolated MEF (2,000 per well) were stimulated for three days with doxycycline (DOX), plated in 384 well plates in the presence or absence of DOX, and analyzed every day thereafter for lamin B1/lamin A/C expression and DNA content by high content analysis. *Red symbols*, cells stimulated with 2 µg/ml DOX, *green symbols*, cells stimulated with DOX and replated into DOX-free medium on day 0. Data for each day are normalized to unstimulated cells (blue). Boxes and whiskers show median, second and third quartiles, and range. Data are based on 14 technical replicates from a single experiment that has been repeated once.

| Class       | Day        | Plate      | Max/Min | Pass/Fail | Mean  | SD   | CV          | Z           |
|-------------|------------|------------|---------|-----------|-------|------|-------------|-------------|
| Intra Plate | 1          | 1          | max     | Pass      | 8.30  | 1.05 | 12.7        |             |
|             |            | 2          | max     | Pass      | 8.60  | 1.01 | 11.8        |             |
|             |            | 3          | min     | Pass      | -8.08 | 0.84 | 10.4        |             |
|             |            | 4          | min     | Pass      | -8.82 | 0.91 | 10.4        |             |
|             |            | All Plates |         | Pass      |       |      |             | <b>0.65</b> |
|             | 2          | 1          | max     | Pass      | 7.76  | 1.14 | 14.7        |             |
|             |            | 2          | max     | Pass      | 7.91  | 1.17 | 14.7        |             |
|             |            | 3          | min     | Pass      | -7.63 | 0.76 | 9.9         |             |
|             |            | 4          | min     | Pass      | -8.04 | 0.82 | 10.2        |             |
|             |            | All Plates |         | Pass      |       |      |             | <b>0.62</b> |
|             | 3          | 1          | max     | Pass      | 8.04  | 0.97 | 12.1        |             |
|             |            | 2          | max     | Pass      | 8.50  | 0.95 | 11.2        |             |
| 3           |            | min        | Pass    | -7.97     | 0.97  | 12.1 |             |             |
| 4           |            | min        | Pass    | -8.57     | 0.96  | 11.2 |             |             |
|             | All Plates |            | Pass    |           |       |      | <b>0.64</b> |             |
| Inter Plate | 1          | 1 and 2    | max     | Pass      | 8.45  | 1.04 | 12.4        |             |
|             |            | 3 and 4    | min     | Pass      | -8.45 | 0.95 | 11.3        |             |
|             | 2          | 1 and 2    | max     | Pass      | 7.84  | 1.16 | 14.7        |             |
|             |            | 3 and 4    | min     | Pass      | -7.84 | 0.81 | 10.4        |             |
|             | 3          | 1 and 2    | max     | Pass      | 8.27  | 0.99 | 11.9        |             |
|             |            | 3 and 4    | min     | Pass      | -8.27 | 1.01 | 12.2        |             |
| Day To Day  | Day 1 And  | All Plates | max     | Pass      | 8.14  | 1.14 | 14.0        |             |
|             |            | All Plates | min     | Pass      | -8.14 | 0.94 | 11.5        |             |
|             | Day 2 And  | All Plates | max     | Pass      | 8.05  | 1.10 | 13.6        |             |
|             |            | All Plates | min     | Pass      | -8.05 | 0.94 | 11.7        |             |

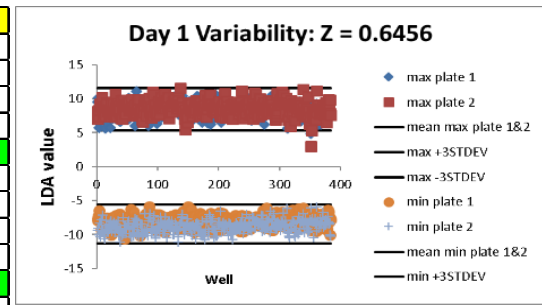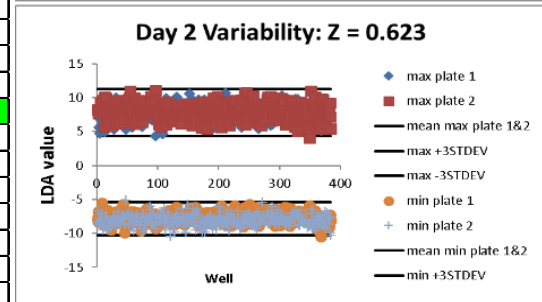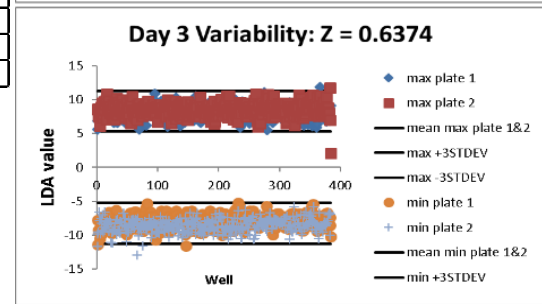

**Supplemental Figure 3. Three day variability assessment.** Two full microplates of minimum (unstimulated) and maximum (stimulated) TMRE-MEFs were processed on three separate days. Plates were stained with an anti-lamin B1 antibody and scanned on an ArrayScan VTI high content reader. Twenty seven cellular readouts were aggregated by linear discriminant analysis (LDA) into a single LDA value, which was used to calculate Z-factors and %CV. Table shows numerical results of intra-plate and inter-plate variability; scatter plots illustrate assay performance on each day of experiments.
